# Supplementary material for: Effect of hypertonic saline on mucociliary clearance and clinical outcomes in chronic bronchitis
Source: PubMed Central journal article supplement — ERJ Open Res. 2020 Aug 11;6(3):00269-2020. doi: 10.1183/23120541.00269-2020 (PMC7418818; doi:10.1183/23120541.00269-2020), 2020-08-11
Supplement: 00269-2020.tableS1.pdf [file 00269-2020.tableS1.pdf]

Table S1. Patient reported outcomes using St. George's Respiratory Questionnaire for COPD (SGRQ-C) and Cough and Sputum Assessment Questionnaire (CASA-Q). Scores range from 0-100, with lower values indicating improvement.

| Questionnaire         | Baseline, 7% | 2-week, 7%  | Baseline, 0.12% | 2-week, 0.12% |
|-----------------------|--------------|-------------|-----------------|---------------|
| SGRQ-C                |              |             |                 |               |
| Symptom Score (adj.)  | 71.5 ± 14.1  | 66.5 ± 19.5 | 71.4 ± 15.1     | 72.9 ± 16.6   |
| Activity Score (adj.) | 60.5 ± 15.3  | 61.3 ± 16.6 | 63.5 ± 21.9     | 64.7 ± 21.3   |
| Impact Score (adj.)   | 35.7 ± 19.0  | 34.7 ± 20.6 | 36.1 ± 18.7     | 34.9 ± 21.9   |
| Overall Score (adj.)  | 53.7 ± 15.8  | 52.6 ± 19.6 | 55.0 ± 18.6     | 55.0 ± 20.6   |
| CASA-Q                |              |             |                 |               |
| COUS score            | 40.5 ± 19.0  | 42.8 ± 23.2 | 40.2 ± 19.0     | 44.5 ± 25.8   |
| COUI score            | 52.6 ± 20.7  | 59.1 ± 23.6 | 59.2 ± 22.6     | 60.7 ± 24.9   |
| SPUS score            | 48.1 ± 16.3  | 47.4 ± 19.7 | 49.6 ± 19.2     | 47.7 ± 17.9   |
| SPUI score            | 59.3 ± 23.5  | 63.8 ± 24.6 | 61.0 ± 25.3     | 64.4 ± 22.2   |
